# Supplementary material for: Synthesis, structural and theoretical studies of an iron–gallium(i) heterocycle complex: Analogies with N-heterocyclic carbene chemistry
Source: Royal Society of Chemistry journal article supplement (doi:10.1039/b308616j), 2003-01-01
Supplement: b308616j.doc [file b308616j.doc]

Synthesis, Structural and Theoretical Studies of an Iron-Gallium(I) Heterocycle Complex: Analogies with N-Heterocyclic Carbene Chemistry

# Robert J. Baker, Cameron Jones* and Jamie A. Platts

**SUPPLEMENTARY MATERIAL**

**Supplementary Calculation Data for 7, 8 and Fe(CO)5**

All geometries were optimised in Gaussian98 [a] using the methods recommended by Boehme and Frenking[b], namely the BP86 density functional [c] with a 6-31G(d) basis set on C, N, O, and H [d] and Stuttgart-Dresden ECP/basis set on Fe and Ga [e], augmented by a d-type polarisation function with exponent 0.207 on Ga [f]. All geometries were characterised as true minima *via* harmonic frequency calculation. Atomic charges, orbital populations, and bonding analysis were obtained from the NBO scheme [g], while charge decomposition analysis employed the method developed by Frenking [h].

[a] Gaussian 98, Revision A.10, M. J. Frisch, G. W. Trucks, H. B. Schlegel, G. E. Scuseria, M. A. Robb, J. R. Cheeseman, V. G. Zakrzewski, J. A. Montgomery, Jr., R. E. Stratmann, J. C. Burant, S. Dapprich, J. M. Millam, A. D. Daniels, K. N. Kudin, M. C. Strain, O. Farkas, J. Tomasi, V. Barone, M. Cossi, R. Cammi, B. Mennucci, C. Pomelli, C. Adamo, S. Clifford, J. Ochterski, G. A. Petersson, P. Y. Ayala, Q. Cui, K. Morokuma, P. Salvador, J. J. Dannenberg, D. K. Malick, A. D. Rabuck, K. Raghavachari, J. B. Foresman, J. Cioslowski, J. V. Ortiz, A. G. Baboul, B. B. Stefanov, G. Liu, A. Liashenko, P. Piskorz, I. Komaromi, R. Gomperts, R. L. Martin, D. J. Fox, T. Keith, M. A. Al-Laham, C. Y. Peng, A. Nanayakkara, M. Challacombe, P. M. W. Gill, B. Johnson, W. Chen, M. W. Wong, J. L. Andres, C. Gonzalez, M. Head-Gordon, E. S. Replogle, and J. A. Pople, Gaussian, Inc., Pittsburgh PA, 2001.

[b] C. Boehme and G. Frenking, *Chem. Eur. J.*, 1999, **5**, 7

[c] a) A.D. Becke, *Phys. Rev. A*, 1988, **38**, 3098. b) J.P. Perdew, *Phys. Rev. A*, 1986, **33**, 8822.

[d] a) R. Ditchfield, W.J. Hehre, J.A. Pople, *J. Chem. Phys.*, 1971, **54**,724. b) W.J. Hehre, R. Ditchfield, J.A. Pople, *J. Chem. Phys.*, 1972, **56**, 2257. c) M.S. Gordon, *Chem. Phys. Lett.*, 1980, **76**, 163. d) P.C. Hariharan, J.A. Pople, *Theor. Chim. Acta*, 1973, **28**, 213.

[e] a) M. Dolg, U. Wedig, H. Stoll, H. Preuss, *J. Chem. Phys.*, 1987, **86**, 866. b) A. Bergner, M. Dolg, W. Kuehle, H. Stoll, H. Preuss, *Mol. Phys.*, 1993, **80**, 1431.

[f] J. Andzelm, S. Huzinaga, M. Klobukowski, E. Radzio, Y. Sakai, H. Tatekawi*, Gaussian Basis Sets for Molecular Calculations*, Elsevier, Amsterdam, 1984.

[g] A. E. Reed, L. A. Curtiss, F. Weinhold, *Chem. Rev.*, 1988, **88**, 899.

[h] S. Dapprich and G. Frenking, *J. Phys. Chem.*, 1995, **99**, 9352.

## Coordinate file (.xyz) for the fully optimised geometry of 7

Ga -1.097718 -0.000363 -0.010674

N -2.514815 -1.298873 0.004679

N -2.514349 1.298731 0.000603

H -2.490170 -2.316558 -0.003112

H -2.489298 2.316375 -0.010395

C -3.772136 -0.685590 0.008446

C -3.771882 0.685928 0.006295

H -4.686073 -1.290727 0.012705

H -4.685608 1.291399 0.008677

Fe 1.282577 -0.000200 -0.009251

C 3.043984 -0.000080 -0.011760

O 4.224354 0.000360 -0.012230

C 1.080735 -1.536155 -0.871712

O 0.994203 -2.573154 -1.436845

C 1.080129 1.537049 -0.869237

O 0.993067 2.575331 -1.431939

C 1.077148 -0.000516 1.753058

O 1.014589 -0.000893 2.935520

**Coordinate file (.xyz) for the fully optimised geometry of 8**

C -1.241035 0.029470 -0.000365

N -2.118225 1.081239 -0.007882

N -2.079153 -1.055214 0.006637

H -1.797214 2.048430 -0.014977

H -1.716208 -2.006752 0.013534

C -3.449525 0.671482 -0.005260

C -3.424754 -0.696496 0.003806

H -4.279798 1.372762 -0.010433

H -4.229178 -1.427252 0.008089

Fe 0.728896 0.001720 -0.000604

C 2.514862 -0.023437 -0.000824

O 3.682722 -0.032846 -0.002236

C 0.714414 1.782325 -0.005830

O 0.634030 2.957079 -0.007910

C 0.651253 -0.882895 1.554819

O 0.588404 -1.455600 2.577097

C 0.651876 -0.898257 -1.547004

O 0.588618 -1.482040 -2.562930

**Coordinate file (.xyz) for the fully optimised geometry of Fe(CO)5**

C 0.000000 0.000000 1.805745

O 0.000000 0.000000 2.967979

Fe 0.000000 0.000000 0.000000

C 0.000000 1.803641 0.000000

O 0.000000 2.968916 0.000000

C 0.000000 0.000000 -1.805745

O 0.000000 0.000000 -2.967979

C 1.561999 -0.901821 0.000000

O 2.571157 -1.484458 0.000000

C -1.561999 -0.901821 0.000000

O -2.571157 -1.484458 0.000000

**Natural Atomic Orbital and Natural Bond Order Analyses for 7.**

NATURAL POPULATIONS: Natural atomic orbital occupancies

NAO Atom No lang Type(AO) Occupancy Energy

---------------------------------------------------------

1 Ga 1 s Val( 4s) 0.89977 0.16210

2 Ga 1 s Ryd( 5s) 0.00252 16.75692

3 Ga 1 px Val( 4p) 0.33515 0.48549

4 Ga 1 px Ryd( 5p) 0.00108 1.79768

5 Ga 1 py Val( 4p) 0.23754 0.19752

6 Ga 1 py Ryd( 5p) 0.00371 0.81878

7 Ga 1 pz Val( 4p) 0.40460 0.10799

8 Ga 1 pz Ryd( 5p) 0.00242 0.42171

9 Ga 1 dxy Ryd( 4d) 0.00043 1.59216

10 Ga 1 dxz Ryd( 4d) 0.00081 0.82070

11 Ga 1 dyz Ryd( 4d) 0.00035 0.73572

12 Ga 1 dx2y2 Ryd( 4d) 0.00116 2.03509

13 Ga 1 dz2 Ryd( 4d) 0.00041 1.39939

14 N 2 s Cor( 1s) 1.99943 -13.72113

15 N 2 s Val( 2s) 1.42207 -0.39920

16 N 2 s Ryd( 3s) 0.00145 1.65382

17 N 2 px Val( 2p) 1.46086 -0.04660

18 N 2 px Ryd( 3p) 0.00255 1.38658

19 N 2 py Val( 2p) 1.44084 -0.04575

20 N 2 py Ryd( 3p) 0.00459 1.98820

21 N 2 pz Val( 2p) 1.68466 -0.05279

22 N 2 pz Ryd( 3p) 0.00179 0.88551

23 N 2 dxy Ryd( 3d) 0.00042 2.32771

24 N 2 dxz Ryd( 3d) 0.00058 1.95822

25 N 2 dyz Ryd( 3d) 0.00009 1.84590

26 N 2 dx2y2 Ryd( 3d) 0.00117 2.38251

27 N 2 dz2 Ryd( 3d) 0.00105 2.20206

28 N 3 s Cor( 1s) 1.99943 -13.72111

29 N 3 s Val( 2s) 1.42206 -0.39918

30 N 3 s Ryd( 3s) 0.00145 1.65372

31 N 3 px Val( 2p) 1.46076 -0.04659

32 N 3 px Ryd( 3p) 0.00255 1.38606

33 N 3 py Val( 2p) 1.44097 -0.04573

34 N 3 py Ryd( 3p) 0.00459 1.98848

35 N 3 pz Val( 2p) 1.68463 -0.05277

36 N 3 pz Ryd( 3p) 0.00179 0.88550

37 N 3 dxy Ryd( 3d) 0.00042 2.32762

38 N 3 dxz Ryd( 3d) 0.00058 1.95826

39 N 3 dyz Ryd( 3d) 0.00009 1.84598

40 N 3 dx2y2 Ryd( 3d) 0.00117 2.38263

41 N 3 dz2 Ryd( 3d) 0.00105 2.20202

42 H 4 s Val( 1s) 0.59654 0.25588

43 H 4 s Ryd( 2s) 0.00229 0.75188

44 H 5 s Val( 1s) 0.59652 0.25591

45 H 5 s Ryd( 2s) 0.00229 0.75187

46 C 6 s Cor( 1s) 1.99889 -9.65474

47 C 6 s Val( 2s) 0.92472 -0.02006

48 C 6 s Ryd( 3s) 0.00179 1.06574

49 C 6 px Val( 2p) 0.98777 0.10745

50 C 6 px Ryd( 3p) 0.00437 1.01626

51 C 6 py Val( 2p) 1.07162 0.09529

52 C 6 py Ryd( 3p) 0.00429 0.82933

53 C 6 pz Val( 2p) 1.13833 0.03263

54 C 6 pz Ryd( 3p) 0.00285 0.69453

55 C 6 dxy Ryd( 3d) 0.00112 2.38137

56 C 6 dxz Ryd( 3d) 0.00078 1.92219

57 C 6 dyz Ryd( 3d) 0.00082 1.98066

58 C 6 dx2y2 Ryd( 3d) 0.00099 2.43844

59 C 6 dz2 Ryd( 3d) 0.00075 2.29855

60 C 7 s Cor( 1s) 1.99889 -9.65474

61 C 7 s Val( 2s) 0.92472 -0.02006

62 C 7 s Ryd( 3s) 0.00179 1.06574

63 C 7 px Val( 2p) 0.98770 0.10746

64 C 7 px Ryd( 3p) 0.00437 1.01611

65 C 7 py Val( 2p) 1.07172 0.09529

66 C 7 py Ryd( 3p) 0.00429 0.82946

67 C 7 pz Val( 2p) 1.13829 0.03263

68 C 7 pz Ryd( 3p) 0.00285 0.69453

69 C 7 dxy Ryd( 3d) 0.00112 2.38136

70 C 7 dxz Ryd( 3d) 0.00078 1.92224

71 C 7 dyz Ryd( 3d) 0.00082 1.98061

72 C 7 dx2y2 Ryd( 3d) 0.00099 2.43845

73 C 7 dz2 Ryd( 3d) 0.00075 2.29854

74 H 8 s Val( 1s) 0.79669 0.18237

75 H 8 s Ryd( 2s) 0.00115 0.68421

76 H 9 s Val( 1s) 0.79669 0.18237

77 H 9 s Ryd( 2s) 0.00115 0.68421

78 Fe 10 s Cor( 3s) 1.98288 -3.08748

79 Fe 10 s Val( 5s) 0.46921 1.60819

80 Fe 10 s Ryd( 4s) 0.00623 1.48243

81 Fe 10 s Ryd( 7s) 0.00085 2.64088

82 Fe 10 s Ryd( 6s) 0.00023 2.34768

83 Fe 10 s Ryd( 8s) 0.00010 37.28624

84 Fe 10 px Cor( 3p) 1.99595 -1.92876

85 Fe 10 px Ryd( 4p) 0.00346 1.66903

86 Fe 10 px Ryd( 5p) 0.00156 2.13786

87 Fe 10 px Ryd( 6p) 0.00041 3.17497

88 Fe 10 px Ryd( 7p) 0.00001 39.78388

89 Fe 10 py Cor( 3p) 1.99556 -1.91385

90 Fe 10 py Ryd( 4p) 0.00652 0.82466

91 Fe 10 py Ryd( 5p) 0.00112 0.87580

92 Fe 10 py Ryd( 6p) 0.00031 2.56547

93 Fe 10 py Ryd( 7p) 0.00000 39.90802

94 Fe 10 pz Cor( 3p) 1.99555 -1.91305

95 Fe 10 pz Ryd( 4p) 0.00736 0.82435

96 Fe 10 pz Ryd( 5p) 0.00101 0.87591

97 Fe 10 pz Ryd( 6p) 0.00032 2.53694

98 Fe 10 pz Ryd( 7p) 0.00000 39.92104

99 Fe 10 dxy Val( 3d) 1.67863 -0.06582

100 Fe 10 dxy Ryd( 4d) 0.00138 0.69674

101 Fe 10 dxy Ryd( 5d) 0.00034 0.96584

102 Fe 10 dxz Val( 3d) 1.68005 -0.06452

103 Fe 10 dxz Ryd( 4d) 0.00133 0.65629

104 Fe 10 dxz Ryd( 5d) 0.00048 0.93075

105 Fe 10 dyz Val( 3d) 1.62384 -0.07628

106 Fe 10 dyz Ryd( 4d) 0.00179 0.68298

107 Fe 10 dyz Ryd( 5d) 0.00117 0.98870

108 Fe 10 dx2y2 Val( 3d) 1.47220 -0.09838

109 Fe 10 dx2y2 Ryd( 4d) 0.00604 2.32885

110 Fe 10 dx2y2 Ryd( 5d) 0.00126 3.02019

111 Fe 10 dz2 Val( 3d) 1.57143 -0.08288

112 Fe 10 dz2 Ryd( 4d) 0.00305 1.23159

113 Fe 10 dz2 Ryd( 5d) 0.00118 1.64036

114 Fe 10 f(0) Ryd( 4f) 0.00004 5.14688

115 Fe 10 f(C1) Ryd( 4f) 0.00002 5.07889

116 Fe 10 f(S1) Ryd( 4f) 0.00001 5.06271

117 Fe 10 f(C2) Ryd( 4f) 0.00003 5.11902

118 Fe 10 f(S2) Ryd( 4f) 0.00001 5.05452

119 Fe 10 f(C3) Ryd( 4f) 0.00002 5.09361

120 Fe 10 f(S3) Ryd( 4f) 0.00002 5.08122

121 C 11 s Cor( 1s) 1.99944 -9.76594

122 C 11 s Val( 2s) 1.26059 -0.16849

123 C 11 s Ryd( 3s) 0.02970 3.07343

124 C 11 px Val( 2p) 0.84272 0.14444

125 C 11 px Ryd( 3p) 0.02389 1.20423

126 C 11 py Val( 2p) 0.69168 0.00504

127 C 11 py Ryd( 3p) 0.00565 0.79435

128 C 11 pz Val( 2p) 0.69559 0.00507

129 C 11 pz Ryd( 3p) 0.00608 0.78619

130 C 11 dxy Ryd( 3d) 0.00210 2.35561

131 C 11 dxz Ryd( 3d) 0.00211 2.35151

132 C 11 dyz Ryd( 3d) 0.00004 1.83061

133 C 11 dx2y2 Ryd( 3d) 0.00085 2.50950

134 C 11 dz2 Ryd( 3d) 0.00031 2.05773

135 O 12 s Cor( 1s) 1.99966 -18.44180

136 O 12 s Val( 2s) 1.70458 -0.75828

137 O 12 s Ryd( 3s) 0.00162 1.84644

138 O 12 px Val( 2p) 1.64632 -0.20750

139 O 12 px Ryd( 3p) 0.00045 1.12989

140 O 12 py Val( 2p) 1.56127 -0.14107

141 O 12 py Ryd( 3p) 0.00084 1.08565

142 O 12 pz Val( 2p) 1.56342 -0.14100

143 O 12 pz Ryd( 3p) 0.00090 1.08355

144 O 12 dxy Ryd( 3d) 0.00452 1.98105

145 O 12 dxz Ryd( 3d) 0.00452 1.97966

146 O 12 dyz Ryd( 3d) 0.00000 1.81571

147 O 12 dx2y2 Ryd( 3d) 0.00532 2.40628

148 O 12 dz2 Ryd( 3d) 0.00178 2.01256

149 C 13 s Cor( 1s) 1.99943 -9.75427

150 C 13 s Val( 2s) 1.29454 -0.18327

151 C 13 s Ryd( 3s) 0.02735 2.35901

152 C 13 px Val( 2p) 0.69438 0.01251

153 C 13 px Ryd( 3p) 0.00307 0.89439

154 C 13 py Val( 2p) 0.82685 0.09226

155 C 13 py Ryd( 3p) 0.01908 1.75516

156 C 13 pz Val( 2p) 0.76044 0.03377

157 C 13 pz Ryd( 3p) 0.00821 1.10982

158 C 13 dxy Ryd( 3d) 0.00157 2.23492

159 C 13 dxz Ryd( 3d) 0.00049 1.94996

160 C 13 dyz Ryd( 3d) 0.00121 2.44721

161 C 13 dx2y2 Ryd( 3d) 0.00091 2.28703

162 C 13 dz2 Ryd( 3d) 0.00112 2.15322

163 O 14 s Cor( 1s) 1.99967 -18.43167

164 O 14 s Val( 2s) 1.70186 -0.75115

165 O 14 s Ryd( 3s) 0.00159 2.13662

166 O 14 px Val( 2p) 1.55643 -0.13370

167 O 14 px Ryd( 3p) 0.00109 1.10134

168 O 14 py Val( 2p) 1.63126 -0.18441

169 O 14 py Ryd( 3p) 0.00071 1.09064

170 O 14 pz Val( 2p) 1.59209 -0.14795

171 O 14 pz Ryd( 3p) 0.00123 1.08693

172 O 14 dxy Ryd( 3d) 0.00340 1.95725

173 O 14 dxz Ryd( 3d) 0.00104 1.86297

174 O 14 dyz Ryd( 3d) 0.00519 2.28272

175 O 14 dx2y2 Ryd( 3d) 0.00401 2.19440

176 O 14 dz2 Ryd( 3d) 0.00257 1.93025

177 C 15 s Cor( 1s) 1.99943 -9.75429

178 C 15 s Val( 2s) 1.29462 -0.18329

179 C 15 s Ryd( 3s) 0.02735 2.35782

180 C 15 px Val( 2p) 0.69441 0.01250

181 C 15 px Ryd( 3p) 0.00307 0.89471

182 C 15 py Val( 2p) 0.82708 0.09246

183 C 15 py Ryd( 3p) 0.01912 1.75613

184 C 15 pz Val( 2p) 0.76009 0.03353

185 C 15 pz Ryd( 3p) 0.00817 1.10777

186 C 15 dxy Ryd( 3d) 0.00157 2.23592

187 C 15 dxz Ryd( 3d) 0.00049 1.94904

188 C 15 dyz Ryd( 3d) 0.00122 2.44670

189 C 15 dx2y2 Ryd( 3d) 0.00091 2.28824

190 C 15 dz2 Ryd( 3d) 0.00111 2.15250

191 O 16 s Cor( 1s) 1.99967 -18.43169

192 O 16 s Val( 2s) 1.70186 -0.75117

193 O 16 s Ryd( 3s) 0.00159 2.13594

194 O 16 px Val( 2p) 1.55646 -0.13372

195 O 16 px Ryd( 3p) 0.00109 1.10132

196 O 16 py Val( 2p) 1.63137 -0.18456

197 O 16 py Ryd( 3p) 0.00071 1.09057

198 O 16 pz Val( 2p) 1.59195 -0.14784

199 O 16 pz Ryd( 3p) 0.00124 1.08693

200 O 16 dxy Ryd( 3d) 0.00341 1.95768

201 O 16 dxz Ryd( 3d) 0.00103 1.86264

202 O 16 dyz Ryd( 3d) 0.00518 2.28091

203 O 16 dx2y2 Ryd( 3d) 0.00402 2.19586

204 O 16 dz2 Ryd( 3d) 0.00256 1.93044

205 C 17 s Cor( 1s) 1.99944 -9.75468

206 C 17 s Val( 2s) 1.29445 -0.18343

207 C 17 s Ryd( 3s) 0.02839 2.31069

208 C 17 px Val( 2p) 0.70088 0.01239

209 C 17 px Ryd( 3p) 0.00318 0.88223

210 C 17 py Val( 2p) 0.73088 0.01013

211 C 17 py Ryd( 3p) 0.00344 0.81107

212 C 17 pz Val( 2p) 0.85554 0.11623

213 C 17 pz Ryd( 3p) 0.02375 2.02705

214 C 17 dxy Ryd( 3d) 0.00004 1.82789

215 C 17 dxz Ryd( 3d) 0.00204 2.35798

216 C 17 dyz Ryd( 3d) 0.00200 2.35619

217 C 17 dx2y2 Ryd( 3d) 0.00005 1.87014

218 C 17 dz2 Ryd( 3d) 0.00119 2.65643

219 O 18 s Cor( 1s) 1.99967 -18.42971

220 O 18 s Val( 2s) 1.70157 -0.75000

221 O 18 s Ryd( 3s) 0.00160 2.11843

222 O 18 px Val( 2p) 1.55771 -0.13167

223 O 18 px Ryd( 3p) 0.00112 1.10164

224 O 18 py Val( 2p) 1.57146 -0.13120

225 O 18 py Ryd( 3p) 0.00145 1.08491

226 O 18 pz Val( 2p) 1.64843 -0.19872

227 O 18 pz Ryd( 3p) 0.00046 1.09739

228 O 18 dxy Ryd( 3d) 0.00001 1.82474

229 O 18 dxz Ryd( 3d) 0.00441 1.99279

230 O 18 dyz Ryd( 3d) 0.00451 1.98699

231 O 18 dx2y2 Ryd( 3d) 0.00001 1.82783

232 O 18 dz2 Ryd( 3d) 0.00737 2.59878

[ 38 electrons found in the effective core potential]

Summary of Natural Population Analysis:

Natural Population

Natural -----------------------------------------------

Atom No Charge Core Valence Rydberg Total

-----------------------------------------------------------------------

Ga 1 1.11006 28.00000 1.87706 0.01288 29.88994

N 2 -1.02154 1.99943 6.00843 0.01368 8.02154

N 3 -1.02154 1.99943 6.00842 0.01368 8.02154

H 4 0.40117 0.00000 0.59654 0.00229 0.59883

H 5 0.40119 0.00000 0.59652 0.00229 0.59881

C 6 -0.13909 1.99889 4.12244 0.01775 6.13909

C 7 -0.13906 1.99889 4.12242 0.01775 6.13906

H 8 0.20216 0.00000 0.79669 0.00115 0.79784

H 9 0.20216 0.00000 0.79669 0.00115 0.79784

Fe 10 -0.51294 17.96993 8.49536 0.04764 26.51294

C 11 0.43925 1.99944 3.49058 0.07073 5.56075

O 12 -0.49519 1.99966 6.47559 0.01994 8.49519

C 13 0.36135 1.99943 3.57622 0.06300 5.63865

O 14 -0.50214 1.99967 6.48164 0.02083 8.50214

C 15 0.36136 1.99943 3.57621 0.06300 5.63864

O 16 -0.50215 1.99967 6.48164 0.02083 8.50215

C 17 0.35473 1.99944 3.58176 0.06408 5.64527

O 18 -0.49977 1.99967 6.47917 0.02094 8.49977

=======================================================================

* Total * -1.00000 69.96299 73.56338 0.47363 144.00000

Natural Population

--------------------------------------------------------

Effective Core 38.00000

Core 31.96299 ( 99.8843% of 32)

Valence 73.56338 ( 99.4100% of 74)

Natural Minimal Basis 143.52637 ( 99.6711% of 144)

Natural Rydberg Basis 0.47363 ( 0.3289% of 144)

--------------------------------------------------------

Atom No Natural Electron Configuration

----------------------------------------------------------------------------

Ga 1 [core]4s( 0.90)4p( 0.98)5p( 0.01)

N 2 [core]2s( 1.42)2p( 4.59)3p( 0.01)

N 3 [core]2s( 1.42)2p( 4.59)3p( 0.01)

H 4 1s( 0.60)

H 5 1s( 0.60)

C 6 [core]2s( 0.92)2p( 3.20)3p( 0.01)

C 7 [core]2s( 0.92)2p( 3.20)3p( 0.01)

H 8 1s( 0.80)

H 9 1s( 0.80)

Fe 10 [core]4s( 0.01)3d( 8.03)4p( 0.02)5s( 0.47)4d( 0.01)

C 11 [core]2s( 1.26)2p( 2.23)3s( 0.03)3p( 0.04)3d( 0.01)

O 12 [core]2s( 1.70)2p( 4.77)3d( 0.02)

C 13 [core]2s( 1.29)2p( 2.28)3s( 0.03)3p( 0.03)3d( 0.01)

O 14 [core]2s( 1.70)2p( 4.78)3d( 0.02)

C 15 [core]2s( 1.29)2p( 2.28)3s( 0.03)3p( 0.03)3d( 0.01)

O 16 [core]2s( 1.70)2p( 4.78)3d( 0.02)

C 17 [core]2s( 1.29)2p( 2.29)3s( 0.03)3p( 0.03)3d( 0.01)

O 18 [core]2s( 1.70)2p( 4.78)3d( 0.02)

**Summary of CDA Results**

|  | d | b | r | d/b | De a |
| --- | --- | --- | --- | --- | --- |
| **7** | 0.625 | 0.184 | -0.318 | 3.40 | 94.0 |
| **8** | 0.573 | 0.169 | -0.296 | 3.39 | 64.9 |
| **Fe(CO)5** | 0.569 | 0.326 | -0.306 | 1.75 | 52.2 |

a kCal/mol, thermally corrected

### Calculated CO stretching frequencies

|  | 1 | 2 | 3 | 4 | 5 |
| --- | --- | --- | --- | --- | --- |
| **7** | 1900 (eq) | 1900 (eq) | 1918 (eq) | 1981 (ax) |  |
| **8** | 1936 (eq) | 1956 (eq) | 1982 (eq) | 2040 (ax) |  |
| **Fe(CO)5** | 2007 | 2007 | 2025 | 2029 | 2101 |
